# Supplementary material
Source: PubMed Central journal article supplement (PMC6248112)
Supplement: jamaneurol-75-1375-s001.pdf [file jamaneurol-75-1375-s001.pdf]

## Supplementary Online Content

Johnson EL, Krauss GL, Lee AK, et al. Association between midlife risk factors and late-onset epilepsy: results from the Atherosclerosis Risk in Communities Study. *JAMA Neurol*. Published online July 23, 2018. doi:10.1001/jamaneurol.2018.1935

**eTable 1.** Life's Simple Seven Categories from the AHA's Life's Simple 7 Cardiovascular Health Metrics

**eTable 2:** Hazard Ratios (HRs) for Developing Late-onset Epilepsy Under Definition 2.

**eTable 3:** Hazard Ratios for Late-onset Epilepsy With Age of First Seizure 67 or Older, and Using 2 years After First Claim Code as Origin

**eTable 4:** Hazard Ratios for Late-onset Epilepsy Using Multiple Imputations for Missing Data

**eTable 5:** Hazard Ratios for Developing Late-Onset Epilepsy With Death as a Competing Risk

This supplementary material has been provided by the authors to give readers additional information about their work.

**eTable 1: Life’s Simple Seven categories (after Folsom et al.<sup>20</sup>) from the AHA’s Life’s Simple 7 Cardiovascular Health Metrics<sup>19</sup>.** AHA = American Heart Association; min = minutes; SBP = systolic blood pressure; DBP = diastolic blood pressure.

| Health Measure                  | Poor (0 points)                         | Intermediate (1 point)                                                                        | Ideal (2 points)                                                                                             |
|---------------------------------|-----------------------------------------|-----------------------------------------------------------------------------------------------|--------------------------------------------------------------------------------------------------------------|
| Smoking                         | Current                                 | Former                                                                                        | Never                                                                                                        |
| Body mass index                 | $\geq 30$ kg/m <sup>2</sup>             | 25-29.99 kg/m <sup>2</sup>                                                                    | <25 kg/m <sup>2</sup>                                                                                        |
| Physical activity               | None                                    | 1-149 min/week moderate or<br>1-74 min/week vigorous or<br>1-149 min/week moderate + vigorous | $\geq 150$ min/week moderate or<br>$\geq 75$ min/week vigorous or<br>$\geq 150$ min/week moderate + vigorous |
| Healthy diet score <sup>a</sup> | 0-1 components                          | 2-3 components                                                                                | 4-5 components                                                                                               |
| Total cholesterol               | $\geq 240$ mg/dl                        | 200-239 mg/dl or<br><200 mg/dl treated                                                        | <200mg/dl, without medication                                                                                |
| Blood pressure                  | SBP $\geq 140$ or<br>DBP $\geq 90$ mmHg | SBP 120-139 mmHg or<br>DBP 80-89 mmHg or<br><120/<80 mmHg treated                             | <120/<80 mmHg,<br>without medication                                                                         |
| Fasting serum glucose           | $\geq 126$ mg/dl                        | 100-125 mg/dl or treated<br>to <100 mg/dl                                                     | <100 mg/dl, without medication                                                                               |

<sup>a</sup> Healthy Diet Components:

- Fruits and vegetables:  $\geq 4.5$  cup per day.
- Fish:  $\geq$ two 3.5 oz servings per week (preferably oily fish).
- Fiber-rich whole grains ( $\geq 1.1$  g of fiber per 10 g of carbohydrate):  $\geq$ three 1-oz-equivalent servings per day.
- Sodium: <1500 mg per day.
- Sugar-sweetened beverages:  $\leq 450$  kcal (36 oz) per week.

**eTable 2: Hazard Ratios for developing late-onset epilepsy under definition 2.**

Definition 2 includes at least one ICD-9 code for epilepsy, seizures, or convulsions plus use of anti-epileptic drug; n=286 cases. Stroke and dementia are time-varying covariates. Model includes visit 1 age and all variables in table. NC = North Carolina; MS = Mississippi; MN = Minnesota; MD = Maryland; HS = high school; SD = standard deviation.

| <b>Variable</b>                | <b>Hazard Ratio</b> | <b>95% Confidence Interval</b> |
|--------------------------------|---------------------|--------------------------------|
| Field center – race            |                     |                                |
| NC – white                     | Reference           |                                |
| NC – black                     | 1.25                | 0.66-2.37                      |
| MS – black                     | 0.92                | 0.64-1.33                      |
| MN – white                     | 0.75                | 0.50-1.12                      |
| MD – white                     | 0.90                | 0.63-1.27                      |
| Sex (Male)                     | 0.89                | 0.68-1.16                      |
| Education (HS grad or more)    | 0.85                | 0.65-1.11                      |
| Hypertension                   | 1.06                | 0.82-1.38                      |
| <b>Diabetes</b>                | <b>1.52</b>         | <b>1.12-2.07</b>               |
| Exercise (per sex-adjusted SD) | 0.92                | 0.81-1.04                      |
| Alcohol use                    |                     |                                |
| 1-7 drinks/week                | 0.84                | 0.61-1.17                      |
| >7 drinks/week                 | 0.99                | 0.63-1.54                      |
| Smoking (per 20 pack-years)    | 1.00                | 0.86-1.13                      |
| APOEε4                         |                     |                                |
| 1 allele                       | 1.18                | 0.91-1.52                      |
| 2 alleles                      | 1.51                | 0.87-2.64                      |
| <b>Stroke</b>                  | <b>2.91</b>         | <b>2.17-3.91</b>               |
| <b>Dementia</b>                | <b>2.76</b>         | <b>2.07-3.68</b>               |

**eTable 3: Hazard ratios for late-onset epilepsy with age of first seizure 67 or older, and for use of 2 years after first claim code as origin for Cox proportional hazards analysis.**

First seizure age 67 or older: N=530 cases. All variables in table and visit 1 age are included in the same model. Stroke and dementia are time-varying covariates. NC = North Carolina; MS = Mississippi; MN = Minnesota; MD = Maryland; HS = high school; SD = standard deviation.

| Variable                       | First seizure 67 or older |                         | 2 years after first claim code as origin |                         |
|--------------------------------|---------------------------|-------------------------|------------------------------------------|-------------------------|
|                                | Hazard Ratio              | 95% Confidence Interval | Hazard Ratio                             | 95% Confidence Interval |
| Field center – race            |                           |                         |                                          |                         |
| NC – white                     | 1.0 (Reference)           |                         | 1.0 (Reference)                          |                         |
| <b>NC – black</b>              | <b>1.81</b>               | <b>1.14-2.86</b>        | <b>1.71</b>                              | <b>1.10-2.65</b>        |
| MS – black                     | 1.18                      | 0.88-1.57               | <b>1.34</b>                              | <b>1.03-1.76</b>        |
| MN – white                     | 0.93                      | 0.69-1.26               | 1.00                                     | 0.75-1.33               |
| MD - white                     | 1.17                      | 0.91-1.52               | 1.23                                     | 0.96-1.57               |
| Sex (Male)                     | 0.95                      | 0.78-1.16               | 0.97                                     | 0.81-1.15               |
| Education (HS+)                | 1.06                      | 0.86-1.30               | 1.17                                     | 0.97-1.42               |
| <b>Hypertension</b>            | <b>1.27</b>               | <b>1.05-1.53</b>        | <b>1.23</b>                              | <b>1.04-1.47</b>        |
| <b>Diabetes</b>                | <b>1.44</b>               | <b>1.14-1.82</b>        | <b>1.30</b>                              | <b>1.05-1.62</b>        |
| Exercise (per sex-adjusted SD) | 0.94                      | 0.85-1.03               | 0.93                                     | 0.85-1.01               |
| <b>Alcohol use</b>             |                           |                         |                                          |                         |
| <b>1-7 drinks/week</b>         | <b>0.75</b>               | <b>0.59-0.96</b>        | <b>0.75</b>                              | <b>0.60-0.95</b>        |
| >7 drinks/week                 | 1.05                      | 0.78-1.41               | 1.03                                     | 0.78-1.36               |
| Smoking (per 20 pack-years)    | 1.08                      | 0.99-1.17               | 1.07                                     | 0.99-1.16               |
| <b>APOEε4 status</b>           |                           |                         |                                          |                         |
| <b>1 allele</b>                | <b>1.24</b>               | <b>1.03-1.51</b>        | 1.19                                     | 1.00-1.42               |
| <b>2 alleles</b>               | <b>2.05</b>               | <b>1.39-3.04</b>        | <b>2.01</b>                              | <b>1.40-2.90</b>        |
| <b>Stroke</b>                  | <b>3.22</b>               | <b>2.61-3.99</b>        | <b>3.11</b>                              | <b>2.57-3.77</b>        |
| <b>Dementia</b>                | <b>2.55</b>               | <b>2.07-3.15</b>        | <b>2.51</b>                              | <b>2.06-3.05</b>        |

**eTable 4**  
**Hazard Ratios for developing late-onset epilepsy using multiple imputations for missing data.**

All variables in table and visit 1 age are included in the same model. Missing at baseline: education level (n=21), hypertension (n=74), diabetes (n=95), exercise level (n=63), smoking history (n=239), alcohol use (n=80), APOEε4 genotype (n=508). NC = North Carolina; MS = Mississippi; MN = Minnesota; MD = Maryland; HS = high school; SD = standard deviation.

| <b>Variable</b>                    | <b>Hazard Ratio</b> | <b>95% Confidence Interval</b> |
|------------------------------------|---------------------|--------------------------------|
| Field center – race                |                     |                                |
| NC – white                         | 1.0 (Reference)     |                                |
| NC – black                         | <b>1.82</b>         | <b>1.21-2.75</b>               |
| MS – black                         | <b>1.32</b>         | <b>1.02-1.70</b>               |
| MN – white                         | 0.95                | 0.72-1.25                      |
| MD – white                         | 1.23                | 0.98-1.56                      |
| Sex (Male)                         | 0.98                | 0.83-1.16                      |
| Education (HS grad or more)        | 1.15                | 0.96-1.38                      |
| <b>Hypertension</b>                | <b>1.20</b>         | <b>1.02-1.42</b>               |
| <b>Diabetes</b>                    | <b>1.33</b>         | <b>1.08-1.64</b>               |
| Exercise (per sex-adjusted SD)     | 0.94                | 0.86-1.02                      |
| Alcohol use                        |                     |                                |
| <b>1-7 drinks/week</b>             | <b>0.80</b>         | <b>0.65-1.00</b>               |
| >7 drinks/week                     | 1.00                | 0.77-1.31                      |
| <b>Smoking (per 20 pack-years)</b> | <b>1.08</b>         | <b>1.01-1.17</b>               |
| APOEε4                             |                     |                                |
| <b>1 allele</b>                    | 1.17                | 0.99-1.39                      |
| <b>2 alleles</b>                   | <b>1.91</b>         | <b>1.33-2.74</b>               |
| <b>Stroke</b>                      | <b>3.05</b>         | <b>2.54-3.67</b>               |
| <b>Dementia</b>                    | <b>2.47</b>         | <b>2.05-2.98</b>               |

**eTable 5****Hazard Ratios for developing late-onset epilepsy with death as a competing risk.**

All variables in table and visit 1 age are included in the same model. NC = North Carolina; MS = Mississippi; MN = Minnesota; MD = Maryland; HS = high school; SD = standard deviation.

Using the cumulative incidence function for competing risks, the cumulative incidence of late-onset epilepsy is 2.87% (95% confidence interval 2.76-2.97) from ages 60-80.

| <b>Variable</b>                | <b>Hazard Ratio</b> | <b>95% Confidence Interval</b> |
|--------------------------------|---------------------|--------------------------------|
| Field center – race            |                     |                                |
| NC – white                     | 1.0 (Reference)     |                                |
| NC – black                     | <b>1.58</b>         | <b>1.02-2.45</b>               |
| MS – black                     | 1.26                | 0.97-1.64                      |
| MN – white                     | 0.97                | 0.73-1.30                      |
| MD – white                     | 1.24                | 0.97-1.58                      |
| Sex (Male)                     | 0.91                | 0.76-1.09                      |
| Education (HS grad or more)    | 1.19                | 0.98-1.45                      |
| <b>Hypertension</b>            | <b>1.21</b>         | <b>1.02-1.45</b>               |
| Diabetes                       | 1.18                | 0.94-1.47                      |
| Exercise (per sex-adjusted SD) | 0.92                | 0.84-1.00                      |
| Alcohol use                    |                     |                                |
| <b>1-7 drinks/week</b>         | <b>0.75</b>         | <b>0.60-0.94</b>               |
| >7 drinks/week                 | 1.00                | 0.76-1.31                      |
| Smoking (per 20 pack-years)    | 1.02                | 0.93-1.10                      |
| <b>APOEε4</b>                  |                     |                                |
| <b>1 allele</b>                | <b>1.21</b>         | <b>1.02-1.45</b>               |
| <b>2 alleles</b>               | <b>1.87</b>         | <b>1.29-2.71</b>               |
| <b>Stroke</b>                  | <b>2.93</b>         | <b>2.39-3.59</b>               |
| <b>Dementia</b>                | <b>2.56</b>         | <b>2.10-3.12</b>               |
